# Supplementary material
Source: publisher figshare collection journal article supplement (https://acs.figshare.com/ndownloader/files/5724939)
Supplement: Supplementary file 1 [file 5724939]

Supplemental Table 1.  $T_m$ s of triplexes formed from  $X^{mT}_{13}$  and various duplex targets. <sup>[a]</sup>

| Duplex target <sup>[b]</sup> | $T_m / ^\circ\text{C}$      |            | $\Delta T_m / ^\circ\text{C}$ <sup>[c]</sup> |
|------------------------------|-----------------------------|------------|----------------------------------------------|
|                              | <i>trans</i> <sup>[d]</sup> | <i>cis</i> |                                              |
| 5'-t/a                       | 30.2 (22.5)                 | 10.7       | 19.5                                         |
| 5'-a/t                       | 30.8 (24.6)                 | 14.4       | 16.4                                         |
| 5'-g/c                       | 22.5 (14.0)                 | 0.0        | 22.5                                         |
| 5'-c/g                       | 26.1 (17.6)                 | 4.5        | 21.5                                         |
| 3'-g/c                       | 35.1 (29.4)                 | 20.1       | 15.0                                         |
| 3'-c/g                       | 28.5 (23.4)                 | 11.7       | 16.8                                         |

## Sequences of the duplex targets

5'-t/a

5'-CGTCGGTT-t-AAAAAAAAAAAAAAAA-TTTCGTGGC-3'  
 3'-GCAGCCAA-a-TTTTTTTTTTTTTT-AAAGCACCG-5'

5'-g/c

5'-CGTCGGTT-g-AAAAAAAAAAAAAAAA-TTTCGTGGC-3'  
 3'-GCAGCCAA-c-TTTTTTTTTTTTTT-AAAGCACCG-5'

3'-g/c

5'-CGTCGGTTT-AAAAAAAAAAAAAAAA-g-TTCGTGGC-3'  
 3'-GCAGCCAAA-TTTTTTTTTTTTTT-c-AAGCACCG-5'

5'-a/t

5'-CGTCGGTT-a-AAAAAAAAAAAAAAAA-TTTCGTGGC-3'  
 3'-GCAGCCAA-t-TTTTTTTTTTTTTT-AAAGCACCG-5'

5'-c/g

5'-CGTCGGTT-c-AAAAAAAAAAAAAAAA-TTTCGTGGC-3'  
 3'-GCAGCCAA-g-TTTTTTTTTTTTTT-AAAGCACCG-5'

3'-c/g

5'-CGTCGGTTT-AAAAAAAAAAAAAAAA-c-TTCGTGGC-3'  
 3'-GCAGCCAAA-TTTTTTTTTTTTTT-g-AAGCACCG-5'

<sup>a)</sup>  $[T_{13}] = [X^{mT}_{13}] = [\text{duplex target}] = 2.0 \mu\text{M}$ ,  $[\text{MgCl}_2] = 0.2 \text{ M}$ , at pH 7.0 (10 mM HEPES buffer).

<sup>b)</sup> The difference among the 31 mer duplex targets is the base pair next to the end of  $T_{13}/A_{13}$  part. For example, target 5'-g/c means that the base pair just next to the end of  $T_{13}/A_{13}$  part is GC, and the base G is at 5'-end direction of the  $A_{13}$  strand. Target 3'-c/g means that the base pair just next to the end of  $T_{13}/A_{13}$  part is CG, but the base C is at 3'-end direction of the  $A_{13}$  strand.

<sup>c)</sup> Change of  $T_m$  induced by *cis*→*trans* isomerization

<sup>d)</sup> Parentheses show the  $T_m$ s of triplexes between natural  $T_{13}$  and duplex targets.

**Supplemental Table 2.** The MALDI-TOFMS results of modified oligonucleotides.

| Sequence                                                      | Obsd.          |                     | Calcd. |
|---------------------------------------------------------------|----------------|---------------------|--------|
|                                                               | Polar fraction | Less polar fraction |        |
| X <sup>p</sup> T <sub>13</sub> :                              |                | 4264.3              | 4264.7 |
| TX <sup>p</sup> T <sub>12</sub> :                             | 4266.4         | 4264.4              | 4264.7 |
| T <sub>2</sub> X <sup>p</sup> T <sub>11</sub> :               | 4265.2         | 4262.9              | 4264.7 |
| T <sub>3</sub> X <sup>p</sup> T <sub>10</sub> :               | 4265.3         | 4263.5              | 4264.7 |
| T <sub>4</sub> X <sup>p</sup> T <sub>9</sub> :                | 4262.0         | 4264.3              | 4264.7 |
| T <sub>5</sub> X <sup>p</sup> T <sub>8</sub> :                | 4263.9         | 4267.6              | 4264.7 |
| T <sub>6</sub> X <sup>p</sup> T <sub>7</sub> :                | 4265.2         | 4264.2              | 4264.7 |
| T <sub>7</sub> X <sup>p</sup> T <sub>6</sub> :                | 4261.8         | 4264.6              | 4264.7 |
| X <sup>p</sup> T <sub>6</sub> X <sup>p</sup> T <sub>7</sub> : | 4642.6         | 4638.2              | 4639.8 |
| T <sub>13</sub> X <sup>p</sup> :                              |                | 4267.4              | 4264.7 |
| X <sup>m</sup> T <sub>13</sub> :                              |                | 4264.1              | 4264.7 |
| TX <sup>m</sup> T <sub>12</sub> :                             | 4264.0         | 4263.1              | 4264.7 |
| T <sub>2</sub> X <sup>m</sup> T <sub>11</sub> :               | 4264.1         | 4266.6              | 4264.7 |
| T <sub>6</sub> X <sup>m</sup> T <sub>7</sub> :                | 4266.0         | 4267.1              | 4264.7 |
| T <sub>13</sub> X <sup>m</sup> :                              |                | 4265.9              | 4264.7 |
| X <sup>m</sup> T <sub>10</sub> C <sub>3</sub> :               |                | 4222.5              | 4219.7 |
| X <sup>m</sup> T <sub>11</sub> C <sub>3</sub> :               |                | 4525.9              | 4523.7 |

Liang et al.

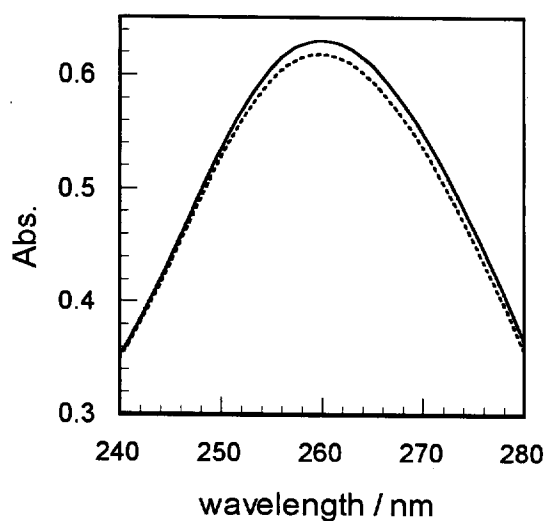

**Supplemental Figure 1.** Hyperchromicity at 260 nm of  $X^mT_{13}/a/t$  triplex caused by the *trans*→*cis* isomerization of azobenzene at 29 °C. The dotted and solid lines are the spectra before and after UV light irradiation, respectively.

$[X^mT_{13}] = [a/t] = 10 \mu\text{M}$ ,  $[\text{MgCl}_2] = 0.2 \text{ M}$ , at pH 7.0 (10 mM HEPES buffer).  $T_m$ s of *trans*- and *cis*- $X^mT_{13}/a/t$  triplex are 37.9 °C and 20.6 °C, respectively. UV irradiation was carried out at the averaged temperature of the  $T_m$ s of *trans*- (37.9 °C) and *cis*-form (20.6 °C).

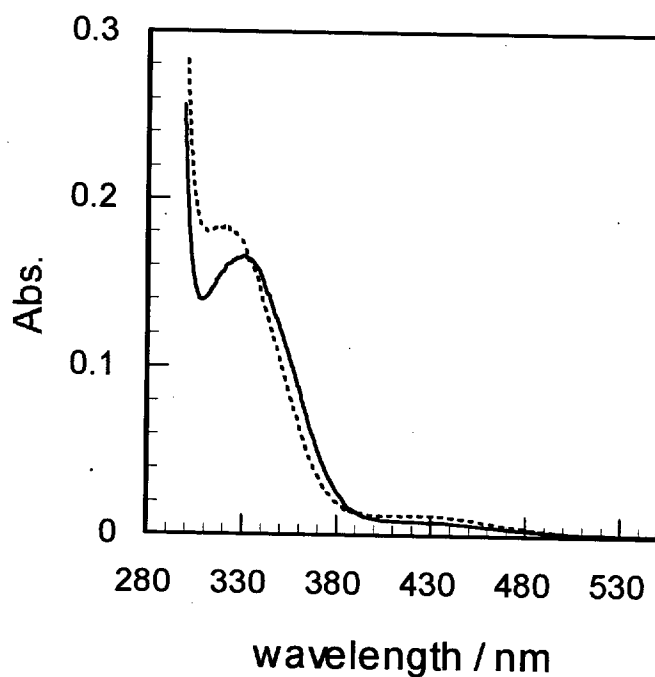

**Supplemental Figure 2.** UV-Vis spectra of the *trans*-X<sup>m</sup>T<sub>13</sub>/a/t at 65 °C (dotted line,  $\lambda_{\text{max}} = 322$  nm) and 0 °C (solid line,  $\lambda_{\text{max}} = 331$  nm).  $[\text{X}^{\text{m}}\text{T}_{13}] = [\text{a/t}] = 10 \mu\text{M}$ ,  $[\text{MgCl}_2] = 0.2 \text{ M}$ , at pH 7.0 (10 mM HEPES buffer).  $T_{\text{m}}$ s of *trans*- and *cis*-X<sup>m</sup>T<sub>13</sub>/a/t triplex are 37.9 °C and 20.6 °C, respectively.

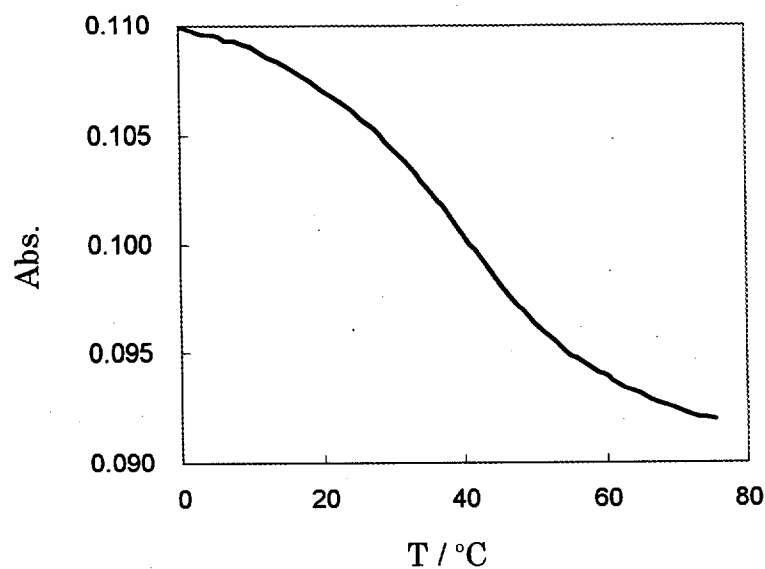

**Supplemental Figure 3.** Melting curve for the triplex *trans*- $X^mT_{13}/a/t$  monitored at 355 nm. The  $T_m$  was determined from this curve as 38.5 °C, which is almost the same as that determined at 280 nm ( $T_m$  at 280 nm = 37.9 °C).

[ $X^mT_{13}$ ] = [a/t] = 10  $\mu$ M, [MgCl<sub>2</sub>] = 0.2 M, at pH 7.0 (10 mM HEPES buffer).
